# Supplementary material for: Development and Application of a Multiple Cross Displacement Amplification Combined With Nanoparticle-Based Lateral Flow Biosensor Assay to Detect Candida tropicalis
Source: Front Microbiol. 2021 Jun 10;12:681488. doi: 10.3389/fmicb.2021.681488 (PMC8222920; doi:10.3389/fmicb.2021.681488)
Supplement: Supplementary file 2 [file Table_1.xls]

## Sheet: Sheet1
ID	Primers name	Primers sequences(5'to3')
1	Ctr-1-F1	CGATACGTAATATGAATTGCAGAT	This study
2	Ctr-1-F2	CCTACCTGATTTGAGGTCAA	This study
3	Ctr-1-CP1	CAGGCATGCCCTTTGGAATAGTGAATCATCGAATTTTTGAACG	This study
4	Ctr-1-CP2	AACGTGGAAACTTATTTTAAGCGACATTGTGGTGGCCACTAGC	This study
5	Ctr-1-C1	CAGGCATGCCCTTTGGAATA	This study
6	Ctr-1-C2	AACGTGGAAACTTATTTTAAGCGAC	This study
7	Ctr-1-D1	CCAAAGGGCGCAATGTG	This study
8	Ctr-1-D2	AGGTTTATCCAAAAACGCTT	This study
9	Ctr-1-R1	AGGGAGAAATGACGCTCAA	This study
10	Ctr-1-R2	TGAGCAATACGCTAGGTT	This study
11
12	Ctr-2-F1	AATTTTTGAACGCACATTGC
13	Ctr-2-F2	CCTACCTGATTTGAGGTCAA
14	Ctr-2-CP1	AACCCGAGGGTTTGAGGGAGCTTTGGTATTCCAAAGGGCA
15	Ctr-2-CP2	ACGTGGAAACTTATTTTAAGCGACTGTTATGAAATAAATTGTGGTGGC
16	Ctr-2-C1	AACCCGAGGGTTTGAGGGAG
17	Ctr-2-C2	ACGTGGAAACTTATTTTAAGCGACT
18	Ctr-2-D1	TGACGCTCAAACAGGCA
19	Ctr-2-D2	AACGCTTATTTTGCTAGTG
20	Ctr-2-R1	GTATTGCTCAACACCA
21	Ctr-2-R2	GCTAGGTTTGTTTGAAAGAA
22
23	Ctr-3-F1	CTTTGGTATTCCAAAGGGC
24	Ctr-3-F2	TGCTTAAGTTCAGCGGGT
25	Ctr-3-CP1	CTAGCGTATTGCTCAACACCAAATGCCTGTTTGAGCGTCA
26	Ctr-3-CP2	AACGCTTATTTTGCTAGTGGCCAGTCCTACCTGATTTGAGGT
27	Ctr-3-C1	CTAGCGTATTGCTCAACACCAA
28	Ctr-3-C2	AACGCTTATTTTGCTAGTGGCC
29	Ctr-3-D1	GAGGGTTTGAGGGAGAA
30	Ctr-3-D2	CCACAATTTATTTCATAACTTTG
31	Ctr-3-R1	GTTTCCACGTTAAATTCTTTC
32	Ctr-3-R2	CGACTTAGGTTTATCCAA
33
34	Ctr-4-F1	ACAACGGATCTCTTGGTTC
35	Ctr-4-F2	AGCGTTTTTGGATAAACCTAAG
36	Ctr-4-CP1	CGTTCAAAAATTCGATGATTCACGAGATGAAGAACGCAGCGAAAT
37	Ctr-4-CP2	CTCCCTCAAACCCTCGGGTTTGCGCTTAAAATAAGTTTCCACGT
38	Ctr-4-C1	CGTTCAAAAATTCGATGATTCACGA
39	Ctr-4-C2	CTCCCTCAAACCCTCGGGTTTG
40	Ctr-4-D1	CAATTCATATTACGTATCGC
41	Ctr-4-D2	GCAATACGCTAGGTTTGTT
42	Ctr-4-R1	ATGCCCTTTGGAATACCAA
43	Ctr-4-R2	GCCTGTTTGAGCGTCAT
